# Supplementary material for: Expression of miR‐93‐5p as a Potential Predictor of the Severity of Chronic Thromboembolic Pulmonary Hypertension
Source: Hindawi journal article supplement (doi:10.1155/2021/6634417), 2021-01-01
Supplement: f1 [file 6634417.f1.pdf]

**Table S1. Primer sequences used for qPCR detection of miR-let-7b-3p, miR-17-5p, miR-106b-5p, miR-3202, miR-665, and miR-93-5p expression**

| <b>Primer</b>               | <b>Sequence (5'-3')</b>                                |
|-----------------------------|--------------------------------------------------------|
| hsa-let-7b-3p-RT            | GTCGTATCCAGTGCAGGGTCCGAGGTA<br>TTCGCACTGGATACGACGGGAAG |
| JH-hsa-let-7b-3p-F          | GCGCCTATAACAACCTACTGC                                  |
| hsa-miR-17-5p-RT            | GTCGTATCCAGTGCAGGGTCCGAGGTAT<br>TCGCACTGGATACGACCTACCT |
| JH-hsa-miR-17-5p-F          | GCCAAAGTGCTTACAGTGC                                    |
| hsa-miR-106b-5p-RT          | GTCGTATCCAGTGCAGGGTCCGAGGTAT<br>TCGCACTGGATACGACATCTGC |
| JH-hsa-miR-106b-5p-F        | GCGCTAAAGTGCTGACAGT                                    |
| hsa-miR-3202-RT             | GTCGTATCCAGTGCAGGGTCCGAGGTAT<br>TCGCACTGGATACGACATTA   |
| JH-hsa-miR-3202-F           | GCTGGAAGGGAGAAGAGC                                     |
| hsa-miR-665-RT              | GTCGTATCCAGTGCAGGGTCCGAGGTAT<br>TCGCACTGGATACGACAGGGGC |
| JH-hsa-miR-665-F            | GCGCACCAGGAGGCTGAG                                     |
| hsa-miR-93-5p-RT            | GTCGTATCCAGTGCAGGGTCCGAGGTAT<br>TCGCACTGGATACGACCTACCT |
| JH-hsa-miR-93-5p-F          | GCCAAAGTGCTGTTCGTGC                                    |
| U6-hF                       | CTCGCTTCGGCAGCACA                                      |
| U6-hR                       | AACGCTTCACGAATTTGCGT                                   |
| Universal downstream primer | GTGCAGGGTCCGAGGT                                       |
